# Supplementary material for: Efficient surface passivation of perovskite films by a post-treatment method with a minimal dose
Source: Royal Society of Chemistry journal article supplement (doi:10.1039/d0ta10581c), 2020-12-24
Supplement: d0ta10581c1.pdf [file d0ta10581c1.pdf]

Supporting information

## Efficient Surface Passivation of Perovskite Films by Post-treatment Method with a Minimal Dose

Dong-Ho Kang<sup>a</sup>, So-Yeon Kim<sup>a</sup>, Jin-Wook Lee<sup>b\*</sup> and Nam-Gyu Park<sup>a\*</sup>

<sup>a</sup>School of Chemical Engineering, Energy Frontier Laboratory, Sungkyunkwan University, Suwon 16419, Korea.

<sup>b</sup>SKKU Advanced Institute of Nanotechnology (SAINT) and Department of Nanoengineering, Sungkyunkwan University, Suwon 16419, Korea.

\* Corresponding authors

J.-W. L. : E-mail : [jw.lee@skku.edu](mailto:jw.lee@skku.edu)

N.-G. P.: E-mail: [npark@skku.edu](mailto:npark@skku.edu)

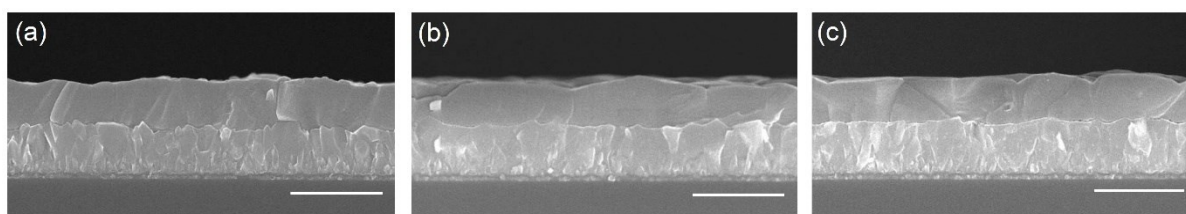

**Figure S1.** Cross-sectional SEM image of (a) the reference film, (b) the film after APP-PT with 5.0 mM TBAI and (c) the film after UIP-PT with 0.05 mM TBAI. The films were formed on FTO substrate. Scale bar is 1  $\mu\text{m}$ .

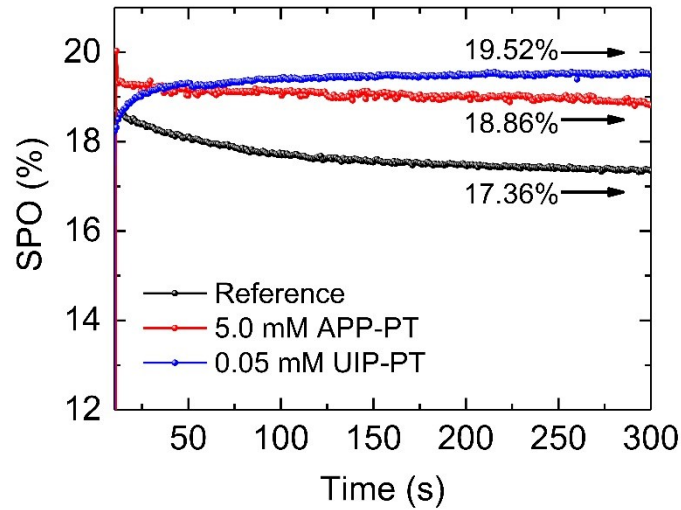

**Figure S2.** The steady-state power outputs (SPOs) of the reference, APP-PT and UIP-PT devices measured for 300 s at the maximum power points.

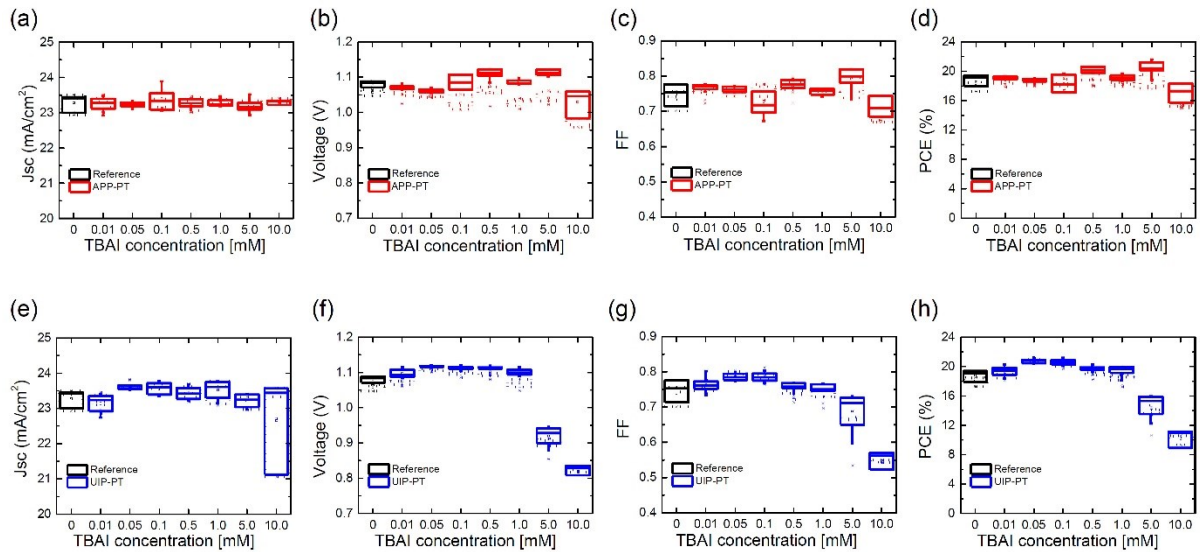

**Figure S3.** Statistical photovoltaic parameters of short-circuit photocurrent density ( $J_{sc}$ ), open-circuit voltage ( $V_{oc}$ ), fill factor (FF) and power conversion efficiency (PCE) for the perovskite films after post-treatment by (a-d) APP-PT and (e-h) UIP-PT process depending on the TBAI concentration. Solid lines and dotted lines represent the reverse-scanned and forward-scanned data, respectively.

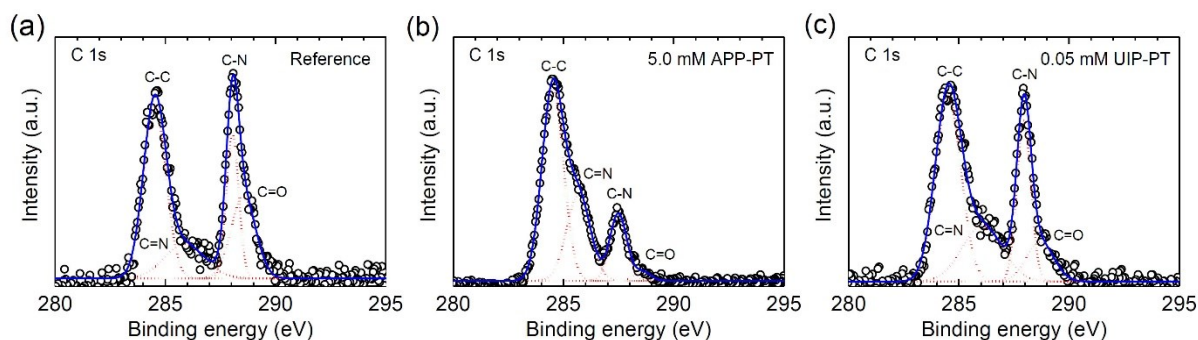

**Figure S4.** C 1s XPS spectra for (a) the reference, (b) 5.0 mM APP-PT and (c) 0.05 mM UIP-PT samples. The binding energy of 284.6 eV was assigned to the C-C bond, which was used for calibration of binding energy.

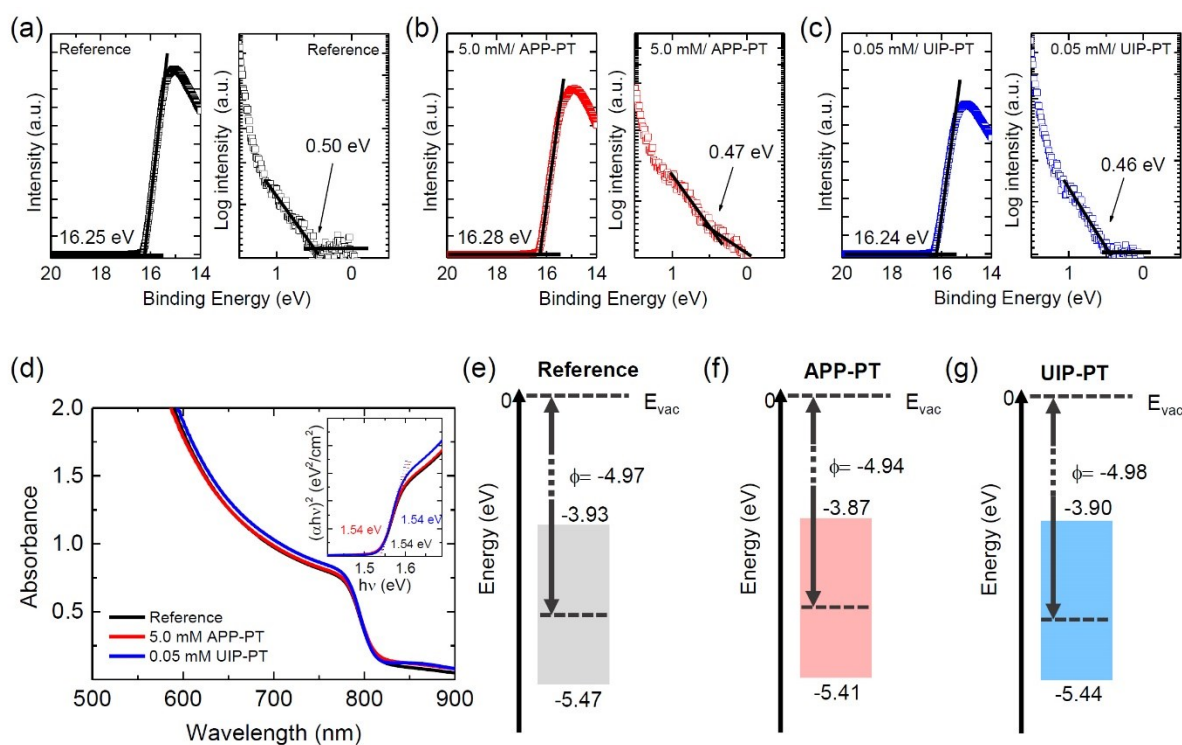

**Figure S5.** UPS (He 1s,  $E=21.22$  eV) spectra showing the cut-off (left panel) and the Fermi edge onset (right panel) region for (a) the reference, (b) APP-PT and (c) UIP-PT films. The perovskite films were prepared on Si wafer substrates. (d) Visible spectra of the perovskite films before and after APP-PT or UIP-PT. Inset shows Tauc plot. (e)-(g) Schematic energy levels constructed by the UPS and Tauc plot results.

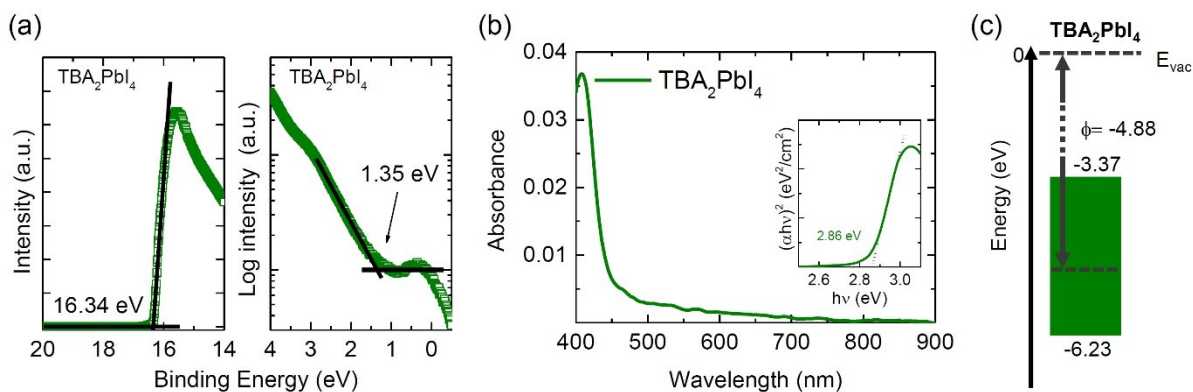

**Figure S6.** (a) UPS spectra showing the cut-off (left panel) and the Fermi edge onset (right panel) region for the TBA<sub>2</sub>PbI<sub>4</sub> film. (b) UV-Visible spectra of the TBA<sub>2</sub>PbI<sub>4</sub> films with a Tauc plot in inset Figure. (c) Schematic energy levels constructed by the UPS and optical bandgap from the Tauc plot.

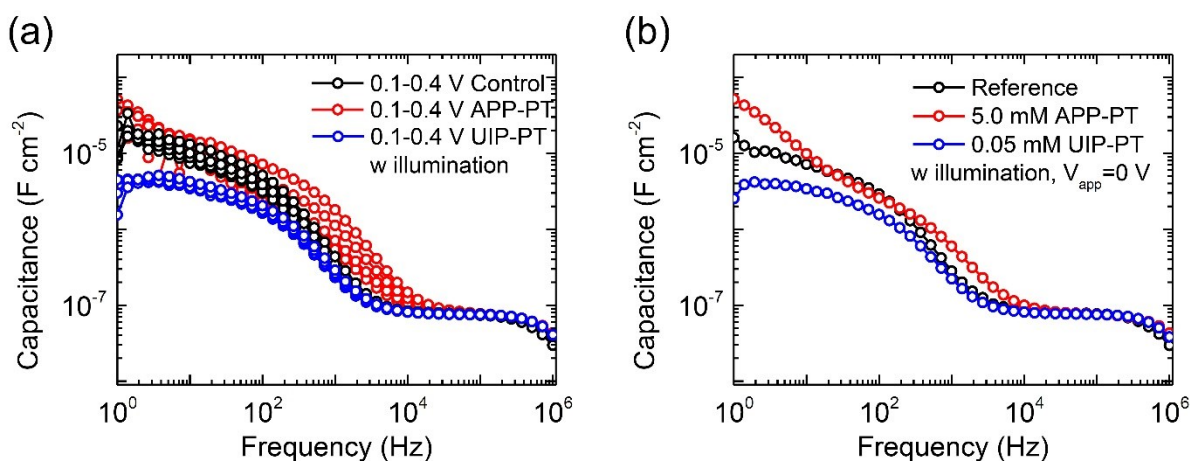

**Figure S7.** Capacitance-frequency curves measured under one sun condition with applied voltage (a) from 0.1 to 0.4 V (0.1 V step size) and (b) short circuit condition (applied voltage is 0 V) with the device structure of FTO/perovskite/Au.

**Table S1.** Capacitance at low frequency region ( $f = 1.0$  Hz), geometrical capacitance ( $C_g$ ) extracted from high frequency region ( $f = 10^5$  Hz) and dielectric constant ( $k$ ) measured from FAPbI<sub>3</sub> films without and with post-treatment based on APP-PT and UIP-PT. The dielectric constants ( $k$ ) were calculated using an equation given by  $C_g = k\epsilon_0 \times A/L$  where  $\epsilon_0$  is the vacuum permittivity,  $A$  is the active area of 0.294 cm<sup>2</sup>, and  $L$  is the film thickness of 520 nm [1, 2].

|                | Capacitance at<br>$f = 1.0$ Hz<br>(F/cm <sup>2</sup> ) | Geometrical<br>capacitance<br>(F/cm <sup>2</sup> ) | Dielectric<br>constant |
|----------------|--------------------------------------------------------|----------------------------------------------------|------------------------|
| Reference      | $1.60 \times 10^{-5}$                                  | $7.66 \times 10^{-8}$                              | 45.01                  |
| 5.0 mM APP-PT  | $5.15 \times 10^{-5}$                                  | $7.52 \times 10^{-8}$                              | 44.21                  |
| 0.05 mM UIP-PT | $2.53 \times 10^{-6}$                                  | $7.56 \times 10^{-8}$                              | 44.40                  |

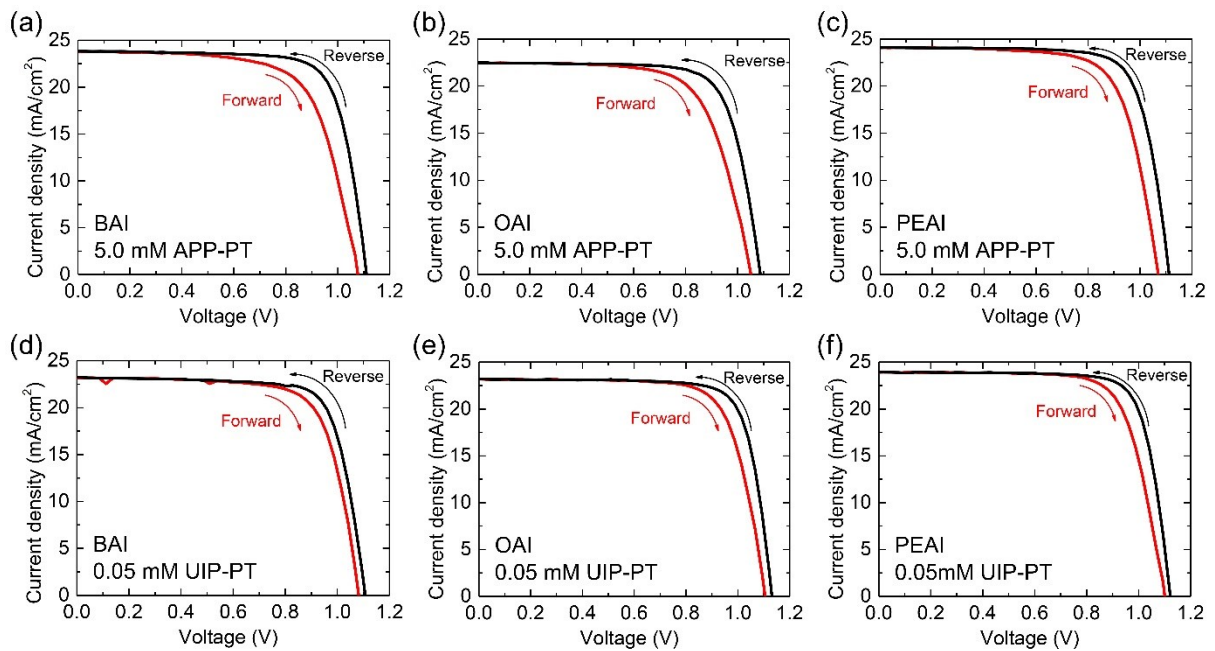

**Figure S8.** J-V curves of the best performing PSCs with post-treatment based on (a-c) APP-PT and (d-f) UIP-PT with BAI, OAI and PEAI as passivating agents, measured under AM 1.5 G one sun illumination (100 mW/cm<sup>2</sup>) at a scan rate of 130 mV/s. The aperture area was 0.125 cm<sup>2</sup>.

**Table S2.** Power conversion efficiency (PCE) and hysteresis index (HI) for the best performing PSCs employing FAPbI<sub>3</sub> perovskite layers with post-treatment based on APP-PT and UIP-PT using BAI, OAI and PEAI. RS and FS stands for reverse scan and forward scan, respectively.

| Post-treatment | Scan direction        | PCE (%) | PCE (%) | PCE (%) |
|----------------|-----------------------|---------|---------|---------|
|                | Hysteresis index (HI) | BAI     | OAI     | PEAI    |
| APP-PT         | RS                    | 20.12   | 20.17   | 20.47   |
|                | FS                    | 17.47   | 18.11   | 18.58   |
|                | HI                    | 0.032   | 0.035   | 0.037   |
| UIP-PT         | RS                    | 19.57   | 20.54   | 21.02   |
|                | FS                    | 18.32   | 19.02   | 19.45   |
|                | HI                    | 0.024   | 0.024   | 0.019   |

## References

- [1] O. Almora, C. Aranda, E. Mas-Marza and G. Garcia-Belmonte, *Appl. Phys. Lett.*, 2016, **109**, 173903.
- [2] J. Chen and N.-G. Park, *Adv. Mater.*, 2019, **31**, 1803019.
